# Supplementary material
Source: publisher figshare collection journal article supplement (https://diabetesjournals.figshare.com/articles/dataset/_/14555988)

**Fig.S1**

**A**

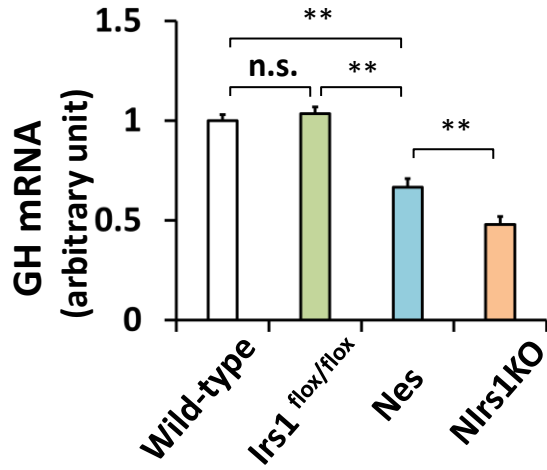

**B**

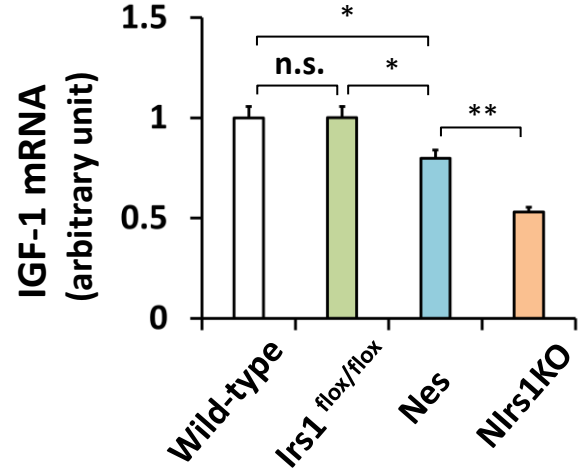

**C**

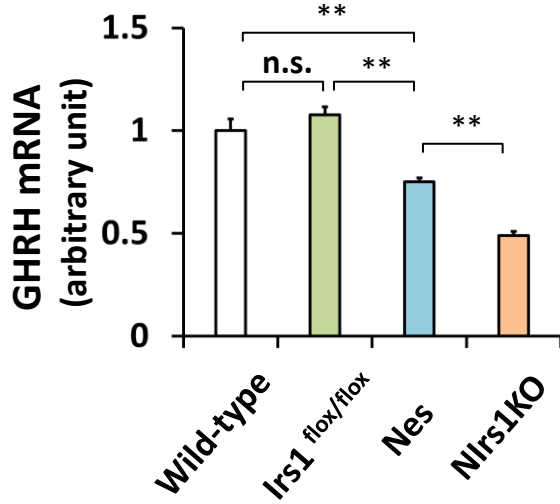

**D**

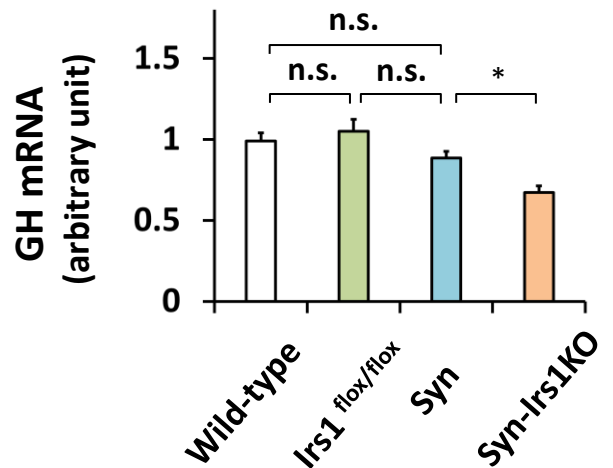

**E**

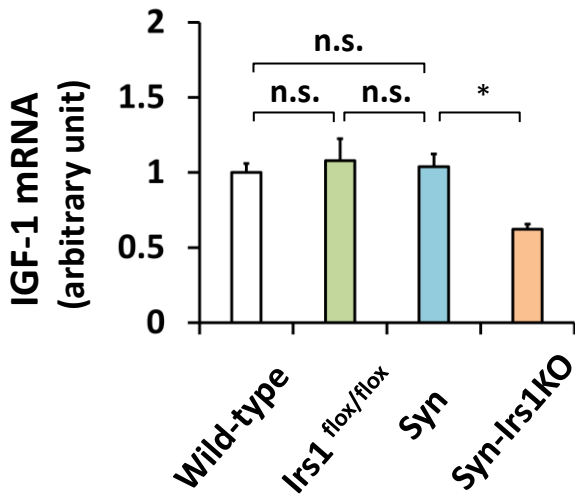

**F**

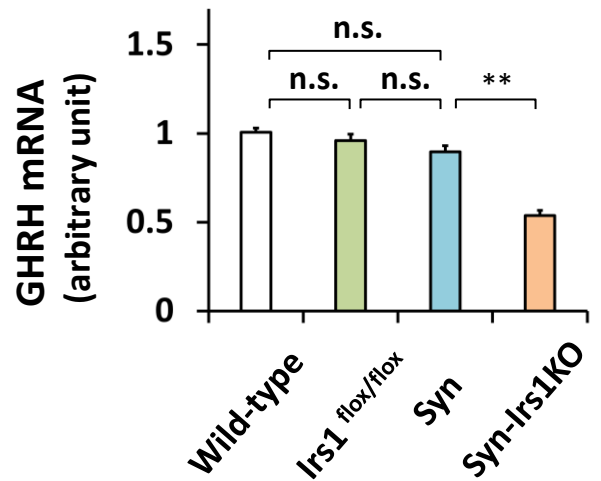

**Fig.S2**

**A**

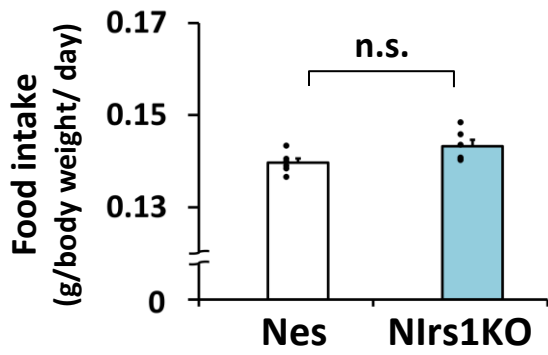

**B**

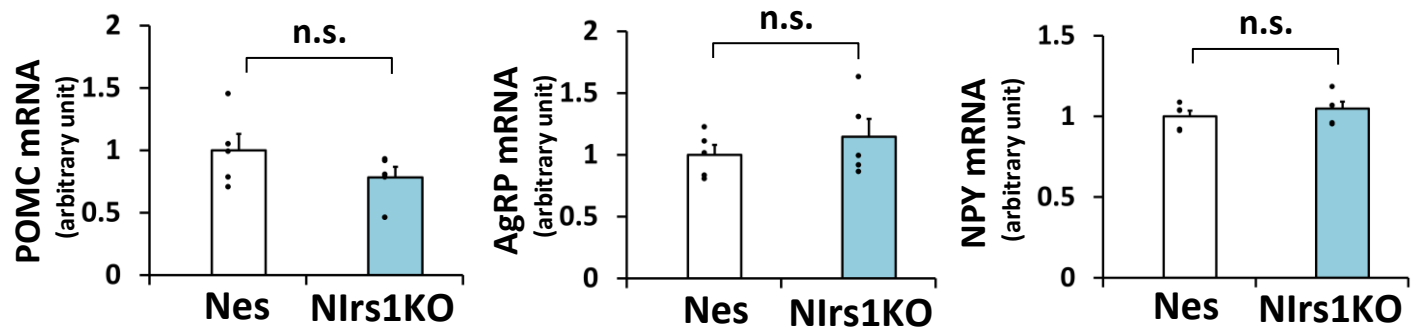

**C**

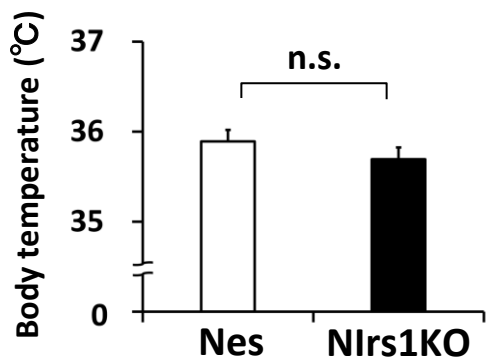

**Fig.S3**

**A**

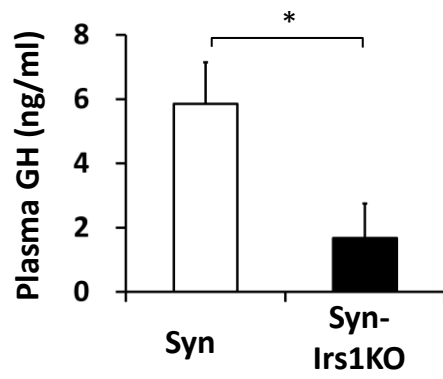

**B**

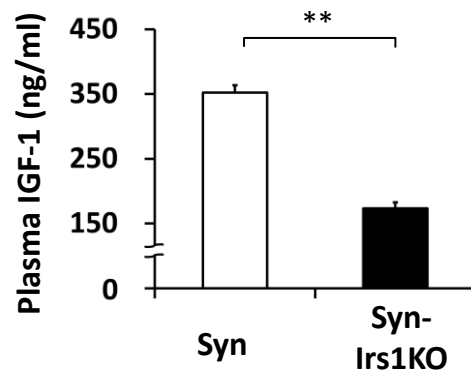

**Fig.S4**

**A**

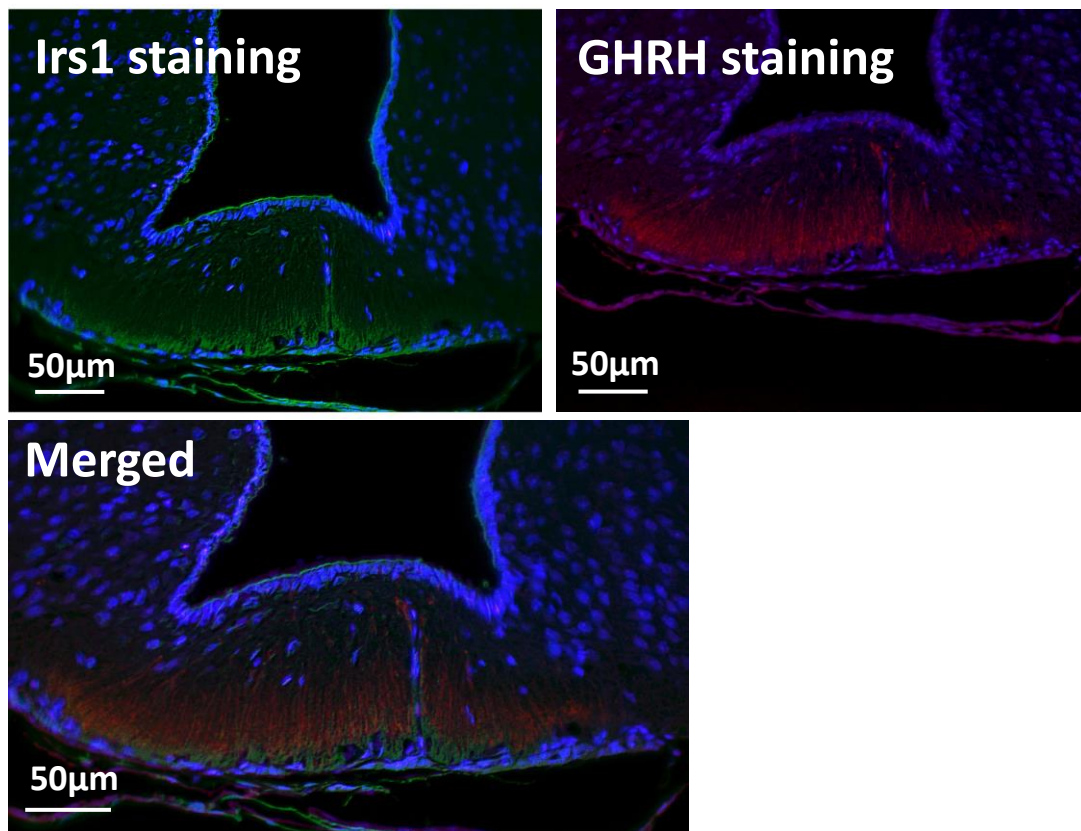

**B**

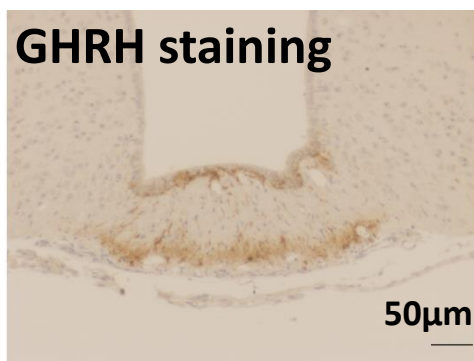

**C**

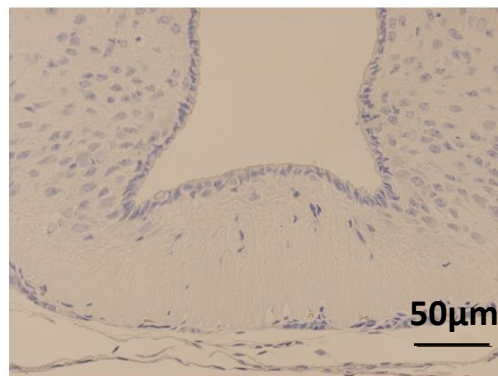

**D**

**Irs1 staining**

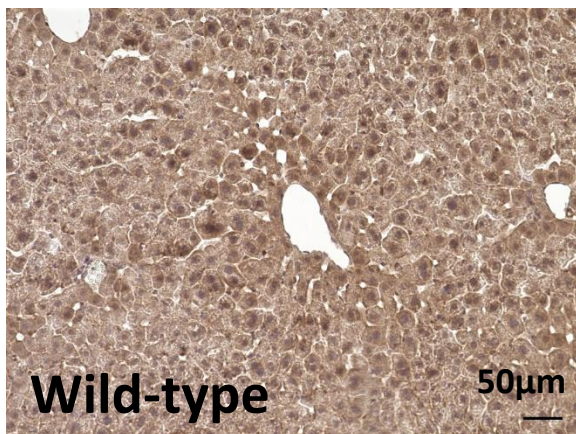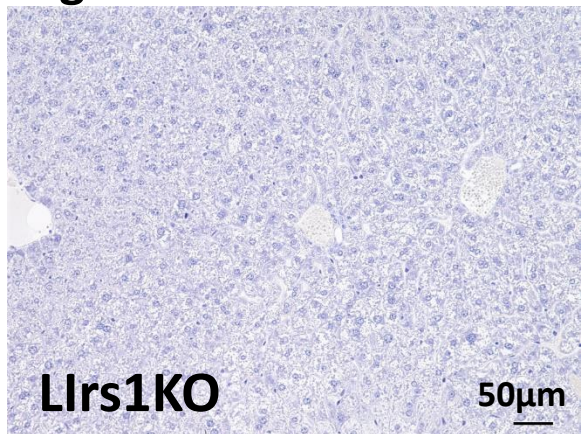

Supplement: Supplementary file 2 [file 1]
